# Supplementary material
Source: PubMed Central journal article supplement (PMC7047110)
Supplement: Supp_Tables1-2.pdf [file Supp_Tables1-2.pdf]

## Supplementary Data

SUPPLEMENTARY TABLE S1. HYPOTHETICAL COST COMPARISON OF IRRIGATION EQUIPMENT/PERSONNEL FOR PERCUTANEOUS NEPHROLITHOTOMY ASSUMING A CENSUS OF 312 PERCUTANEOUS NEPHROLITHOTOMY/YEAR (I.E., 6/WEEK)

| <i>HP irrigation</i>                       |                   |                                  | <i>AIP (Thermedx®)</i>     |                       |                                  |
|--------------------------------------------|-------------------|----------------------------------|----------------------------|-----------------------|----------------------------------|
| <i>Equipment/personnel</i>                 | <i>Total cost</i> | <i>Cost per case<sup>a</sup></i> | <i>Equipment/personnel</i> | <i>Total cost</i>     | <i>Cost per case<sup>a</sup></i> |
| Irrigation tower <sup>b,c</sup>            | \$3460            | \$11.09                          | Thermedx <sup>b</sup>      | \$11,000 <sup>d</sup> | \$35.26                          |
| Irrigation fluid warmer <sup>a,c</sup>     | \$1850            | \$5.96                           |                            |                       |                                  |
| Disposable units                           | \$51.81           | \$00.17                          |                            |                       |                                  |
| Additional circulating nurse hourly salary | \$57.00           | 131.10 <sup>f</sup>              | Thermedx disposable unit   | \$123                 | \$123                            |
| <b>Total</b>                               | <b>\$5427.81</b>  | <b>\$148.31</b>                  |                            |                       |                                  |

<sup>a</sup>Assuming 312 PCNL/year.

<sup>b</sup>Reusable equipment.

<sup>c</sup>Allen® Easy Irrigation Tower (Allen Medical, Acton, MA).

<sup>d</sup>Cost varies by contract.

<sup>e</sup>3M™ Ranger™ Irrigation Warming System (3M Bair Hugger™; Normothermia System, St. Paul, MN).

<sup>f</sup>Based on the average PCNL operative time for HP cases in this report (i.e., 2.3 hours).

AIP=automated irrigation pump; HP=hand pump; PCNL=percutaneous nephrolithotomy.

SUPPLEMENTARY TABLE S2. IDENTITY AND FREQUENCY OF SURGEONS AND CIRCULATING NURSES WHO ANSWERED THE SATISFACTION SURVEY

| <i>Surgeon and nurse identifier</i> | <i>Ureterscopy</i> |                   |          | <i>Percutaneous nephrolithotomy</i> |                   |          |
|-------------------------------------|--------------------|-------------------|----------|-------------------------------------|-------------------|----------|
|                                     | <i>HP (n=26)</i>   | <i>AIP (n=25)</i> | <i>p</i> | <i>HP (n=15)</i>                    | <i>AIP (n=14)</i> | <i>p</i> |
| Surgeon 1                           | 9 (34.6%)          | 3 (12.0%)         | 0.1      | 7 (46.7%)                           | 2 (14.3%)         | 0.2      |
| Surgeon 2                           | 4 (15.4%)          | 6 (24.0%)         |          | 3 (20.0%)                           | 6 (42.9%)         |          |
| Surgeon 3                           | 6 (23.1%)          | 5 (20.0%)         |          | 5 (33.3%)                           | 4 (28.6%)         |          |
| Surgeon 4                           | 0 (0.0%)           | 1 (4.0%)          |          | 0 (0.0%)                            | 1 (7.1%)          |          |
| Surgeon 5                           | 1 (3.8%)           | 6 (24.0%)         |          | 0 (0.0%)                            | 0 (0.0%)          |          |
| Surgeon 6                           | 6 (23.1%)          | 4 (16.0%)         |          | 0 (0.0%)                            | 1 (7.1%)          |          |
| Nurse 1                             | 0 (0%)             | 3 (12.0%)         | 0.9      | 0 (0%)                              | 1 (7.1%)          | 0.8      |
| Nurse 2                             | 1 (3.8%)           | 1 (4.0%)          |          | 1 (6.7%)                            | 0 (0%)            |          |
| Nurse 3                             | 0 (0%)             | 0 (0%)            |          | 1 (6.7%)                            | 0 (0%)            |          |
| Nurse 4                             | 1 (3.8%)           | 0 (0%)            |          | 0 (0%)                              | 0 (0%)            |          |
| Nurse 5                             | 0 (0%)             | 0 (0%)            |          | 0 (0%)                              | 1 (7.1%)          |          |
| Nurse 6                             | 5 (19.2%)          | 4 (16.0%)         |          | 2 (13.3%)                           | 0 (0%)            |          |
| Nurse 7                             | 0 (0%)             | 0 (0%)            |          | 1 (6.7%)                            | 0 (0%)            |          |
| Nurse 8                             | 1 (3.8%)           | 0 (0%)            |          | 1 (6.7%)                            | 0 (0%)            |          |
| Nurse 9                             | 0 (0%)             | 1 (4.0%)          |          | 0 (0%)                              | 0 (0%)            |          |
| Nurse 10                            | 1 (3.8%)           | 0 (0%)            |          | 0 (0%)                              | 0 (0%)            |          |
| Nurse 11                            | 1 (3.8%)           | 0 (0%)            |          | 1 (6.7%)                            | 0 (0%)            |          |
| Nurse 12                            | 2 (7.6%)           | 2 (8.0%)          |          | 2 (13.3%)                           | 1 (7.1%)          |          |
| Nurse 13                            | 0 (0%)             | 0 (0%)            |          | 2 (13.3%)                           | 3 (21.4%)         |          |
| Nurse 14                            | 1 (3.8%)           | 1 (4.0%)          |          | 0 (0%)                              | 0 (0%)            |          |
| Nurse 15                            | 0 (0%)             | 1 (4.0%)          |          | 1 (6.7%)                            | 1 (7.1%)          |          |
| Nurse 16                            | 0 (0%)             | 1 (4.0%)          |          | 0 (0%)                              | 0 (0%)            |          |
| Nurse 17                            | 0 (0%)             | 0 (0%)            |          | 1 (6.7%)                            | 0 (0%)            |          |
| Nurse 18                            | 0 (0%)             | 0 (0%)            |          | 1 (6.7%)                            | 1 (7.1%)          |          |
| Nurse 19                            | 1 (3.8%)           | 0 (0%)            |          | 0 (0%)                              | 0 (0%)            |          |
| Nurse 20                            | 0 (0%)             | 1 (4.0%)          |          | 0 (0%)                              | 0 (0%)            |          |
| Nurse 21                            | 3 (11.5%)          | 2 (8.0%)          |          | 1 (6.7%)                            | 2 (14.2%)         |          |
| Nurse 22                            | 0 (0%)             | 1 (4.0%)          |          | 0 (0%)                              | 0 (0%)            |          |
| Nurse 23                            | 1 (3.8%)           | 0 (0%)            |          | 0 (0%)                              | 0 (0%)            |          |
| Nurse 24                            | 1 (3.8%)           | 0 (0%)            |          | 0 (0%)                              | 0 (0%)            |          |
| Nurse 25                            | 0 (0%)             | 0 (0%)            |          | 0 (0%)                              | 1 (7.1%)          |          |
| Nurse 26                            | 0 (0%)             | 1 (4.0%)          |          | 0 (0%)                              | 0 (0%)            |          |
| Nurse 27                            | 3 (11.5%)          | 2 (8.0%)          |          | 0 (0%)                              | 1 (7.1%)          |          |
| Nurse 28                            | 4 (15.4%)          | 4 (16.0%)         |          | 0 (0%)                              | 2 (14.2%)         |          |
